# Supplementary material for: METTL3 Facilitates Oral Squamous Cell Carcinoma Tumorigenesis by Enhancing c-Myc Stability via YTHDF1-Mediated m6A Modification
Source: PubMed Central journal article supplement — Mol Ther Nucleic Acids. 2020 Feb 4;20:1–12. doi: 10.1016/j.omtn.2020.01.033 (PMC7057159; doi:10.1016/j.omtn.2020.01.033), 2020-02-04
Supplement: mmc1.pdf [file mmc1.pdf]

OMTN, Volume 20

## Supplemental Information

**METTL3 Facilitates Oral Squamous Cell Carcinoma**

**Tumorigenesis by Enhancing c-Myc Stability**

**via YTHDF1-Mediated m<sup>6</sup>A Modification**

**Wei Zhao, Yameng Cui, Lina Liu, Xiaozhou Ma, Xiaoqian Qi, Yue Wang, Zihao Liu, Shiqing Ma, Jingwen Liu, and Jie Wu**

**Table S1.** Primers sequences for qRT-PCR and sequences of shRNA.

|             | Sequences                                                                        |
|-------------|----------------------------------------------------------------------------------|
| METTL3      | forward 5'-CTATCTCCTGGCACTCGCAAGA-3'<br>reverse 5'-GCTTGAACCGTGCAACCACATC-3'     |
| sh-METTL3-1 | GCTGCACTTCAGACGAATTTT                                                            |
| sh-METTL3-2 | TACGCATAGACGATTGGCCCA                                                            |
| sh-METTL3-3 | AATTCGATCCGTCGCAAAGA                                                             |
| c-Myc       | forward, 5'-CAGGACTGTATGTGGAGCGGCTT-3'<br>reverse, 5'-GCGAGCTGCTGTCGTTGAGAGGG-3' |
| YTHDF1      | forward 5'-CAAGCACACAACCTCCATCTTCG-3'<br>reverse 5'-GTAAGAAACTGGTTCGCCCTCAT-3'   |
| GAPDH       | forward 5'-GTCTCCTCTGACTTCAACAGCG-3'<br>reverse 5'-ACCACCCTGTTGCTGTAGCCAA-3'     |
